# Supplementary material
Source: HighWire-hosted journal article supplement (https://cmaj.ca/highwire/filestream/74666/field_highwire_adjunct_files/7/190385-res-7-at.pdf)
Supplement: 190385-res-7-at.pdf [file 190385-res-7-at.pdf]

**Appendix 7 (as supplied by the authors): Adjusted hazard ratios from Cox survival models on all-cause mortality (*n* = 3,390,500 person-years)**

|                                   | Sex-age adjusted   | Fully adjusted     |
|-----------------------------------|--------------------|--------------------|
| Household food insecurity status: |                    |                    |
| Food secure                       | 1.00 (ref)         | 1.00 (ref)         |
| Marginally food-insecure          | 1.62 (1.51 - 1.73) | 1.10 (1.03 - 1.18) |
| Moderately food-insecure          | 1.96 (1.86 - 2.07) | 1.11 (1.05 - 1.18) |
| Severely food-insecure            | 3.25 (3.04 - 3.48) | 1.37 (1.27 - 1.47) |
| Demographics                      |                    |                    |
| Female                            | stratified         | stratified         |
| Age at interview                  | stratified         | stratified         |
| Socioeconomics                    |                    |                    |
| Household income:                 |                    |                    |
| \$0-20 000                        |                    | 1.00 (ref)         |
| \$20 001-40 000                   |                    | 0.89 (0.86 - 0.93) |
| \$40 001-60 000                   |                    | 0.81 (0.77 - 0.85) |
| \$60 001-80 000                   |                    | 0.76 (0.72 - 0.80) |
| \$80 001 and over                 |                    | 0.69 (0.65 - 0.73) |
| Missing from 2005-16              |                    | 0.76 (0.73 - 0.79) |
| Missing from 2017                 |                    | 1.70 (1.44 - 2.02) |
| Housing tenure:                   |                    |                    |
| Renter                            |                    | 1.00 (ref)         |
| Homeowner                         |                    | 0.79 (0.77 - 0.81) |
| Missing                           |                    | 0.79 (0.47 - 1.33) |
| Highest education in household:   |                    |                    |
| High school incomplete            |                    | 0.97 (0.93 - 1.01) |
| High school graduate              |                    | 1.00 (ref)         |
| Some college                      |                    | 0.93 (0.87 - 1.00) |
| College degree                    |                    | 0.92 (0.88 - 0.95) |
| Missing                           |                    | 1.14 (1.06 - 1.22) |
| Household type:                   |                    |                    |
| Married with children             |                    | 1.00 (ref)         |
| Married without children          |                    | 1.11 (1.04 - 1.17) |
| Lone parents                      |                    | 1.40 (1.29 - 1.52) |
| Individuals and other types       |                    | 1.26 (1.19 - 1.34) |
| Missing                           |                    | 1.20 (0.85 - 1.70) |
| Health                            |                    |                    |
| Hospitalized last two years:      |                    |                    |
| No                                |                    | stratified         |
| Yes                               |                    | stratified         |
| Missing (Quebec)                  |                    | stratified         |
| Number of chronic conditions:     |                    |                    |
| None                              |                    | stratified         |
| 1                                 |                    | stratified         |
| 2                                 |                    | stratified         |

|                                |                    |
|--------------------------------|--------------------|
| 3+                             | stratified         |
| Missing                        | stratified         |
| Smoker status:                 |                    |
| Never smoked                   | 1.00 (ref)         |
| Former smoker                  | 1.41 (1.36 - 1.46) |
| Current smoker                 | 3.00 (2.89 - 3.12) |
| Missing                        | 1.98 (1.47 - 2.67) |
| Alcohol consumption last year: |                    |
| None                           | 1.38 (1.34 - 1.43) |
| Up to once a week              | 1.00 (ref)         |
| Twice a week up to once a day  | 0.98 (0.95 - 1.01) |
| Missing                        | 1.33 (1.09 - 1.61) |

---

Note: 95% confidence interval in parentheses. Respondent's sex and age at interview were set as strata in the sex-age adjusted model and fully adjusted model, therefore there were no coefficients for them. Likewise, hospitalization history in the past two years and number of self-reported chronic conditions were also included as strata in the fully adjusted model and therefore present no coefficients.
